# Supplementary material
Source: PubMed Central journal article supplement (PMC6138244)
Supplement: NIHMS979406-supplement-Supplementary_Material.pdf [file NIHMS979406-supplement-Supplementary_Material.pdf]

## Supplementary Materials for

### **A coupled-clock system drives the automaticity of human sinoatrial nodal pacemaker cells**

Kenta Tsutsui, Oliver J. Monfredi, Syevda G. Sirenko-Tagirova, Larissa A. Maltseva, Rostislav Bychkov, Mary S. Kim, Bruce D. Ziman, Kirill V. Tarasov, Yelena S. Tarasova, Jing Zhang, Mingyi Wang, Alexander V. Maltsev, Jaclyn A. Brennan, Igor R. Efimov, Michael D. Stern, Victor A. Maltsev, Edward G. Lakatta\*

\*Corresponding author. Email: lakattae@grc.nia.nih.gov

Published 12 June 2018, *Sci. Signal.* **11**, eaap7608 (2018)  
DOI: 10.1126/scisignal.aap7608

#### **The PDF file includes:**

Fig. S1. Action potential repolarization failure in the transition from arrest to spontaneous action potential firing in response to  $\beta$ -AR stimulation.  
Fig. S2. A schematic of the clock coupling in SANs.  
Table S1. Characteristics of the donor hearts used in the present study.  
Table S2. Time-dependent evolution of action potential parameters in the transition state of an initially arrested human SANC.  
Legends for movies S1 to S3

**Other Supplementary Material for this manuscript includes the following:**  
(available at [www.sciencesignaling.org/cgi/content/full/11/534/eaap7608/DC1](http://www.sciencesignaling.org/cgi/content/full/11/534/eaap7608/DC1))

Movie S1 (.mp4 format). A freshly isolated single spontaneously beating human SANC from heart 3.  
Movie S2 (.mp4 format). LCR detection software on a spontaneously beating human SANC from heart 4.  
Movie S3 (.mp4 format). Simultaneous measurements of membrane potential and a 2D  $\text{Ca}^{2+}$  signal.

## Supplementary Figure S1

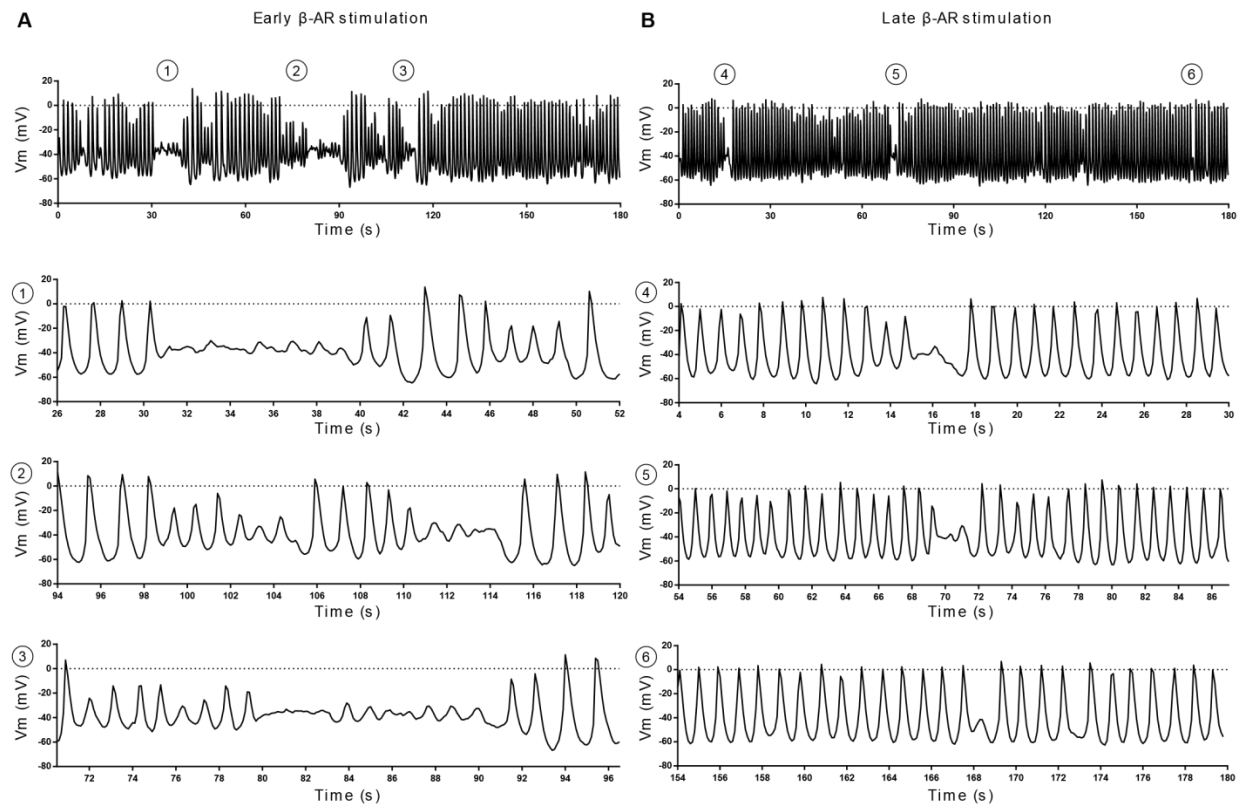

**Fig. S1. Action potential repolarization failure in the transition from arrest to spontaneous action potential firing in response to  $\beta$ -AR stimulation.**

After a variable number of action potentials were fired, the action potential membrane potential failed to repolarize (i.e. repolarization failure) and returned to the same membrane potential level as in the arrested state. Spontaneous oscillations of membrane potential about this arrest state heralded eventual hyperpolarization to the maximum diastolic potential and resumption of action potential firing (**panel A**). As exposure time to  $\beta$ -AR stimulation continued (**panel B**), both the number of repolarization failures and the time at which the cell remained depolarized was reduced (**panel B**).

## Supplementary Figure S2

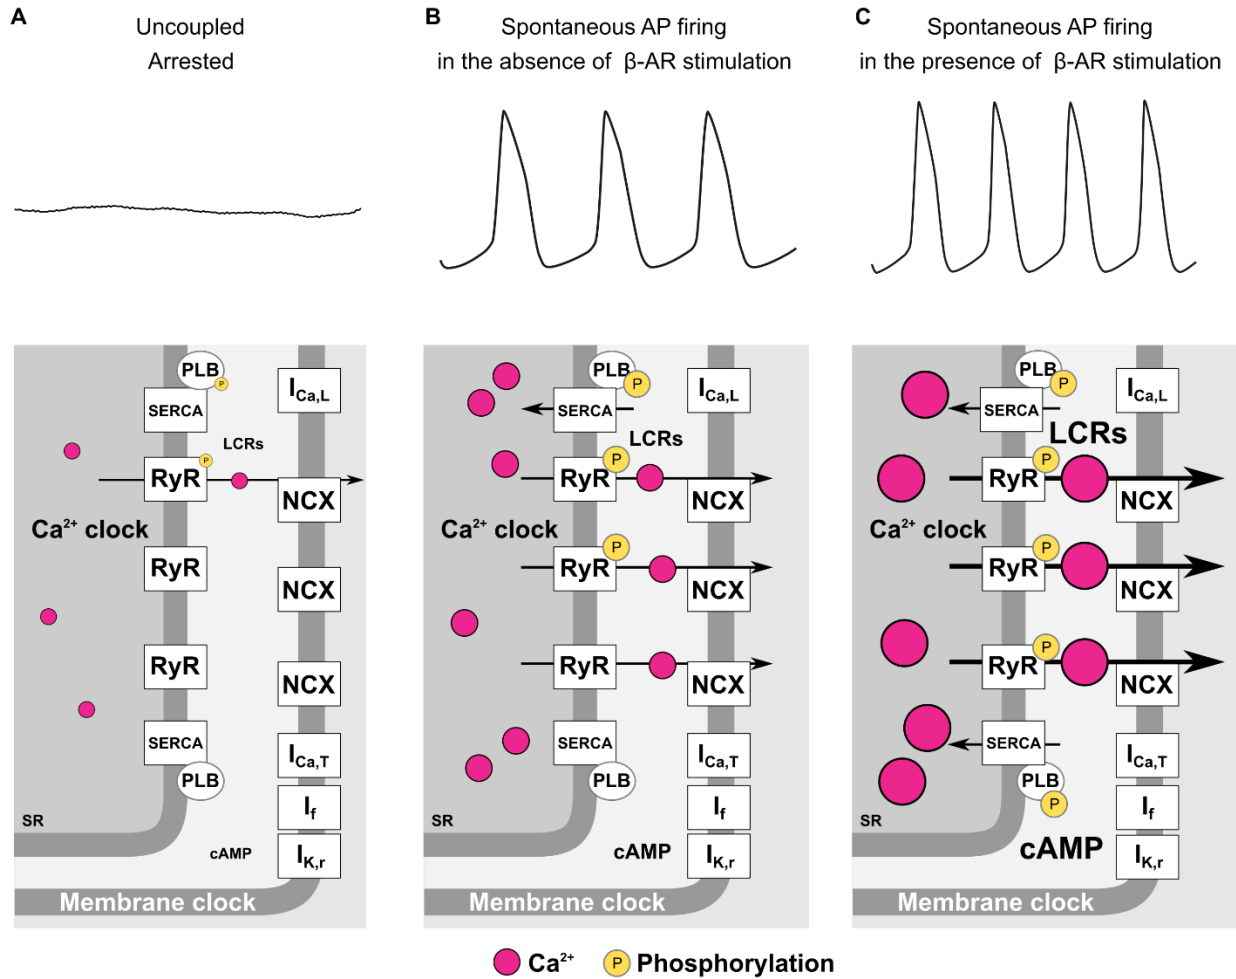

**Fig. S2. A schematic of the clock coupling in SANCs.**

The degree to which the  $\text{Ca}^{2+}$ - and M-clocks of SANC are coupled determines the spontaneous AP firing rate and rhythmicity. Local  $\text{Ca}^{2+}$  releases generated by the roughly periodic  $\text{Ca}^{2+}$  clock become electrogenic only when released  $\text{Ca}^{2+}$  activates NCX to generate a net inward current by exchanging a  $\text{Ca}^{2+}$  ion with 3  $\text{Na}^{+}$  ions. (A) SANC arrest observed in the present study can be envisioned as a manifestation of severe clock uncoupling in which membrane potential is depolarized, the SR  $\text{Ca}^{2+}$  load is small, and small and random local  $\text{Ca}^{2+}$  releases occur but do not produce an ensemble  $\text{Ca}^{2+}$  signal to sufficiently activate  $I_{\text{NCX}}$ . Spontaneous APs do not occur. (B) During spontaneous action potential firing, both cAMP and cAMP-dependent PKA-mediated phosphorylation modulate  $\text{Ca}^{2+}$  and M-clock functions to generate spontaneous action potentials. At a hyperpolarized membrane potential and a larger SR  $\text{Ca}^{2+}$  load, a larger local  $\text{Ca}^{2+}$  release ensemble  $\text{Ca}^{2+}$  signal, and  $I_f$  activation generate inward current contributing to diastolic depolarization. (C)  $\beta$ -AR stimulation enhances M- and  $\text{Ca}^{2+}$  clock coupling that increases local  $\text{Ca}^{2+}$  release synchronization and augments  $I_f$  to increase diastolic depolarization rate, resulting in an increase in the spontaneous action potential firing.

## Supplementary Table 1

**Table S1. Characteristics of the donor hearts used in the present study.**

The hearts were from patients aged 26-65 years. None of the donors had a history of major cardiovascular diseases. LVEF: left ventricular ejection fraction. OD, drug overdose, CVA, cerebrovascular accident, CP, cardioplegic.

|                       | Gender | Age | LVEF (%) | Time in CP solution | Cause of death |
|-----------------------|--------|-----|----------|---------------------|----------------|
| Heart 1<br>(2016 Nov) | Male   | 28  | 50       | ~8h                 | OD             |
| Heart 2<br>(2016 Dec) | Male   | 45  | N/A      | ~8h                 | CVA            |
| Heart 3<br>(2017 Jan) | Male   | 26  | 65       | 4h                  | OD             |
| Heart 4<br>(2017 Jul) | Female | 65  | 60       | 5h                  | Head trauma    |

## Supplementary Table 2

**Table S2. Time-dependent evolution of action potential parameters in the transition state of an initially arrested human SANC.**

Note that  $V_m$  were not recorded in a few minutes during the transition. AP, action potential, TIP, time to ignition point.

| <b><math>\beta</math>-AR stimulation time (s)</b> | <b>Cycle length (ms)</b> | <b>AP amplitude (mV)</b> | <b>TIP (ms)</b> |
|---------------------------------------------------|--------------------------|--------------------------|-----------------|
| <b>30-60</b>                                      | 1710 $\pm$ 190           | 60 $\pm$ 3               | 1570 $\pm$ 190  |
| <b>60-90</b>                                      | 1752 $\pm$ 103           | 62 $\pm$ 3               | 1516 $\pm$ 60   |
| <b>90-120</b>                                     | 1425 $\pm$ 89            | 56 $\pm$ 2               | 1258 $\pm$ 98   |
| <b>120-150</b>                                    | 1428 $\pm$ 77            | 67 $\pm$ 2               | 1260 $\pm$ 99   |
| <b>150-180</b>                                    | 1113 $\pm$ 14            | 61 $\pm$ 2               | 920 $\pm$ 33    |
| <b>600-630</b>                                    | 955 $\pm$ 20             | 62 $\pm$ 2               | 765 $\pm$ 34    |
| <b>630-660</b>                                    | 944 $\pm$ 16             | 54 $\pm$ 2               | 734 $\pm$ 31    |
| <b>660-690</b>                                    | 956 $\pm$ 33             | 60 $\pm$ 2               | 765 $\pm$ 38    |
| <b>690-720</b>                                    | 953 $\pm$ 33             | 58 $\pm$ 3               | 777 $\pm$ 49    |

**Supplementary Movie 1. A freshly isolated single spontaneously beating human SANC from heart 3.**

**Supplementary Movie 2. LCR detection software on a spontaneously beating human SANC from heart 4.** Spontaneous APs were recorded in tandem with AP-induced  $\text{Ca}^{2+}$  transients. AP and AP-induced  $\text{Ca}^{2+}$  transients with most similar CL are overlaid in the figure (black line).

**Supplementary Movie 3. Simultaneous measurements of membrane potential and a 2D  $\text{Ca}^{2+}$  signal.** Measurements in an initially arrested responder SANC were made prior to and during  $\beta$ -AR stimulation. The recorded 2D  $\text{Ca}^{2+}$ -signal (grayscale) and detected LCRs (white areas encircled in colors) are shown in the lower panel. A reconstructed plot in the upper panel shows membrane potential (black), whole-cell  $\text{Ca}^{2+}$  signal (magenta), detected individual local  $\text{Ca}^{2+}$  signals (gray in patterns) and the  $\text{Ca}^{2+}$  signal of the LCR ensemble (blue).
